# Supplementary material for: Coarse-grained simulation study on the self-assembly of miktoarm star-like block copolymers in various solvent conditions
Source: Royal Society of Chemistry journal article supplement (doi:10.1039/c3sm52660g), 2013-12-20
Supplement: c3sm52660g.pdf [file c3sm52660g.pdf]

# Supporting info for: Coarse-grained simulation study on the self-assembly of miktoarm star-like block copolymers in various solvent conditions

Bin Li,<sup>a</sup> Li Zhao,<sup>b</sup> Hu-Jun Qian<sup>a\*</sup> and Zhong-Yuan Lu<sup>a\*</sup>

Received Xth XXXXXXXXXXXX 20XX, Accepted Xth XXXXXXXXXXXX 20XX

First published on the web Xth XXXXXXXXXXXX 200X

DOI: 10.1039/b000000x

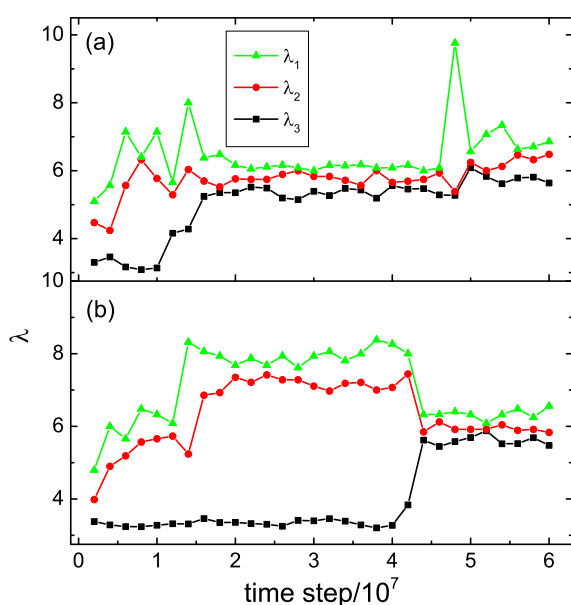

**Fig. S1** The time evolution of  $\lambda_1$ ,  $\lambda_2$  and  $\lambda_3$  of the largest aggregate in the system of  $(A_5)_5$ - $C$ - $(B_{10})_5$  when (a)  $\alpha = 0.5$  and (b)  $\alpha = 0.7$ .

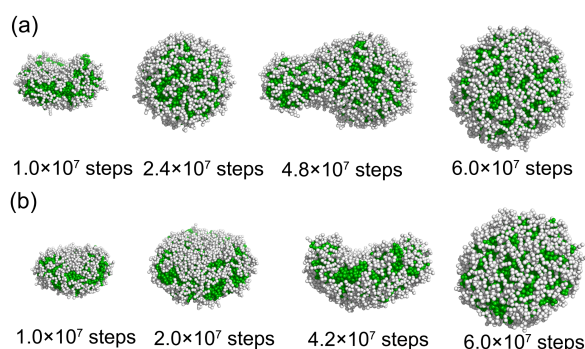

**Fig. S2** Typical structures found in key self-assembly events for the largest aggregate in the system of  $(A_5)_5$ - $C$ - $(B_{10})_5$  when (a)  $\alpha = 0.5$  and (b)  $\alpha = 0.7$ .

<sup>a</sup> Institute of Theoretical Chemistry, State Key Laboratory of Theoretical and Computational Chemistry, Jilin University, Changchun 130023, China; Corresponding Emails: hjqian@jlu.edu.cn; luzhy@jlu.edu.cn

<sup>b</sup> School of Life Science, Jilin University, Changchun 130012, China
